# Supplementary material
Source: PubMed Central journal article supplement (PMC4766035)
Supplement: NIHMS751759-supplement-supplemental_material.pdf [file NIHMS751759-supplement-supplemental_material.pdf]

## **SUPPLEMENTAL MATERIAL**

### **RNA analyses**

Total RNA was isolated and reverse transcribed with AffinityScript QPCR cDNA Synthesis Kit (Agilent Technologies). PCR reactions were performed in triplicate in a 96-well format using the MX3005P (Stratagene). The primer sets (SYBR green) used to detect specific gene expression are as follows: mBDH1 fwd-TCTCGGACTGCCTGCGCTAT, rev-ACCGCTGTTGCAGTAGGTTT; m36B4 fwd-TGGAAGTCCAACACTTTCCTCAA m36B4 rev-ATCTGCTGCATCTGCTTGGAG; mMCT1 fwd-TGCAACGACCAGTGAAGTATC, rev-GACAACCACCAGCGATCATTA; mMCT2 fwd-ATACTTGCAGGTCCTCTCATTC, rev-GGAAGAGGCAGACAACGATAA. 36B4 primer set was included in a separate well (in triplicate) and used to normalize the gene expression data.

### **Proteomics using Stable Isotope Labeling by Amino Acids (SILAC)**

Crude mitochondrial fractions were prepared from cardiac tissue of Lys6 (<sup>13</sup>C6-Lysine, Silantes) labeled (heavy) and non-labeled (light) mice. Mitochondrial fractions were prepared as previously described.<sup>1</sup> Briefly, immediately following euthanasia, the mouse ventricles were dissected, washed and placed in ice-cold isolation buffer (220 mM mannitol, 70 mM sucrose, 5mM HEPES-KOH, pH 7.4, 1mM EGTA, 1mg/ml BSA and protease inhibitor cocktail). The tissue was then minced and homogenized using a Potter-Elvehjem glass/Teflon homogenizer. A crude mitochondrial fraction was extracted from the homogenate using differential centrifugation and resuspended in small amount of the isolation buffer (300 µl).

A 1:1 mixture of heavy and light heart mitochondrial fractions were then separated by gel electrophoresis on precast 4–12% NuPAGE gradient gels (Invitrogen) and stained with the

Colloidal Blue Staining Kit (Invitrogen). Evenly sized gel pieces were excised and processed for mass spectrometry. The gel pieces were subjected to in-gel reduction and alkylation, followed by LysC (Wako) digestion as described previously.<sup>2</sup> In brief, trypsin digested gel pieces were washed twice with 50% 50 mM  $\text{NH}_4\text{HCO}_3$  eluent additive for LC-MS (Sigma-Aldrich) / 50% ethanol for 20 min, and dehydrated with 100% ethanol for 10 min, and then vacuum centrifuged. Gel pieces were reduced with 10 mM DTT for 45 min at 56°C and alkylated with 55 mM iodoacetamide for 30 min at RT in the dark. After two cycles of washing and dehydration, samples were dehydrated twice with 100% ethanol for 15 min and vacuum centrifuged. Gel pieces were digested overnight at 37°C in 50  $\mu\text{l}$  of digestion buffer containing 12.5 ng/ $\mu\text{l}$  of LysC (Wako).

Released peptides were extracted once with 30% acetonitrile/ 3% trifluoroacetic acid (TFA), twice with 70% acetonitrile, followed by two final extractions with 100% acetonitrile. Extracts were vacuum centrifuged to remove acetonitrile and subsequently acidified with 0.5% TFA. Peptides were desalted and concentrated with homemade "STAGE" tips (Stop and Go extraction tips) filled with C-18 (C18 Empore Disks, 3M) as described.<sup>3</sup>

Mass spectrometric experiments were performed on a nano-flow HPLC system (Agilent) connected to a LTQ-Orbitrap XL instrument (Thermo Scientific) equipped with a nanoelectrospray source (Proxeon). The mass spectrometer was operated in the data dependent mode to monitor MS and MS/MS spectra. Survey full-scan MS spectra (from  $m/z$  300–2000) were acquired in the Orbitrap with a resolution of  $R=60,000$  at  $m/z$  400 after accumulation of 1,000,000 ions. The five most intense ions from the preview survey scan delivered by the Orbitrap were sequenced by collision-induced dissociation (CID) in the LTQ. Mass spectra were analyzed using MaxQuant software (Version 1.0.14.10)<sup>4</sup> and all tandem mass spectra were

searched against the mouse International Protein Index protein sequence database (IPI version 3.54) and concatenated with reversed copies of all sequences. The required false positive rate was set to 1% at the protein and peptide level. Maximum allowed mass deviation was set to 7 ppm in MS mode and 0.5 Da for MS/MS peaks. The parameter settings were: LysC as digesting enzyme, a maximum of two missed cleavages, a minimum of six amino acids, carbamidomethylation at cysteine residues as fixed and oxidation at methionine residues as variable modifications.

### **Metabolomic analysis of organic acids and acylcarnitines**

Immediately following deep anesthesia by intraperitoneal injection of pentobarbital (100 mg/kg body weight), bi-ventricle was excised and frozen. Specimens of powdered bi-ventricle tissue were diluted 20-fold (mass:volume) in 50% acetonitrile supplemented with 0.3% formate (acylcarnitines, amino acids, and organic acids). Samples were homogenized in a TissueLyser II (Qiagen). Tissue extracts were derivatized and analyzed as previously described.<sup>5</sup> Levels of succinate, C4OH-carnitine, and C2-carnitine were determined using stable isotope dilution techniques. The data were acquired using a Waters Acquity<sup>TM</sup> UPLC system equipped with a TQ (triple quadrupole) detector and a data system controlled by MassLynx 4.1 operating system (Waters Corporation). Metabolites were quantified using methods described previously.<sup>6</sup>

**Supplemental Table 1: Mitochondrial proteins identified by proteomic profiling in compensated hypertrophy (CH) and/or heart failure (HF) samples.**

| <b>ID</b>                                           | <b>Gene Name</b>                                                                                                                                                                                                                                                  |
|-----------------------------------------------------|-------------------------------------------------------------------------------------------------------------------------------------------------------------------------------------------------------------------------------------------------------------------|
| IPI00387379                                         | 2,4-dienoyl CoA reductase 1, mitochondrial                                                                                                                                                                                                                        |
| IPI00379694, IPI00127625                            | 3-hydroxy-3-methylglutaryl-Coenzyme A lyase                                                                                                                                                                                                                       |
| IPI00330754, IPI00890322, IPI00857778               | 3-hydroxybutyrate dehydrogenase, type 1                                                                                                                                                                                                                           |
| IPI00885424, IPI00154047                            | 3-hydroxyisobutyryl-Coenzyme A hydrolase                                                                                                                                                                                                                          |
| IPI00132653, IPI00856651, IPI00858156               | 3-oxoacid CoA transferase 1                                                                                                                                                                                                                                       |
| IPI00606168, IPI00856229, IPI00227445, IPI00407499  | 4-aminobutyrate aminotransferase                                                                                                                                                                                                                                  |
| IPI00648312                                         | 5'-nucleotidase domain containing 3                                                                                                                                                                                                                               |
| IPI00648235, IPI00187512                            | 5'-nucleotidase, cytosolic III                                                                                                                                                                                                                                    |
| IPI00230589, IPI00230591, IPI00230590, IPI00894854, | A kinase (PRKA) anchor protein 1                                                                                                                                                                                                                                  |
| IPI00890007, IPI00230593, IPI00115506, IPI00230592  |                                                                                                                                                                                                                                                                   |
| IPI00323406                                         | ATP synthase mitochondrial F1 complex assembly factor 1                                                                                                                                                                                                           |
| IPI00336348                                         | ATP synthase mitochondrial F1 complex assembly factor 2; similar to ATP synthase mitochondrial F1 complex assembly factor 2                                                                                                                                       |
| IPI00468481                                         | ATP synthase, H <sup>+</sup> transporting mitochondrial F1 complex, beta subunit                                                                                                                                                                                  |
| IPI00856424, IPI00125460                            | ATP synthase, H <sup>+</sup> transporting, mitochondrial F0 complex, subunit F pseudogene; similar to ATP synthase coupling factor 6, mitochondrial precursor (ATPase subunit F6); ATP synthase, H <sup>+</sup> transporting, mitochondrial F0 complex, subunit F |
| IPI00341282                                         | ATP synthase, H <sup>+</sup> transporting, mitochondrial F0 complex, subunit b, isoform 1; predicted gene 12231                                                                                                                                                   |
| IPI00857439, IPI00130280                            | ATP synthase, H <sup>+</sup> transporting, mitochondrial F1 complex, alpha subunit, isoform 1                                                                                                                                                                     |
| IPI00750074, IPI00313475, IPI00775853, IPI00776084, | ATP synthase, H <sup>+</sup> transporting, mitochondrial F1 complex, gamma polypeptide 1                                                                                                                                                                          |
| IPI00776275, IPI00751391, IPI00776312               |                                                                                                                                                                                                                                                                   |
| IPI00761646, IPI00672663, IPI00816848               | ATP-binding cassette, sub-family B (MDR/TAP), member 7                                                                                                                                                                                                            |
| IPI00856267, IPI00856425, IPI00123422, IPI00459383  | ATP-binding cassette, sub-family B (MDR/TAP), member 8                                                                                                                                                                                                            |
| IPI00135646, IPI00553576                            | ATP-binding cassette, sub-family D (ALD), member 3                                                                                                                                                                                                                |
| IPI00108410                                         | ATPase family, AAA domain containing 1                                                                                                                                                                                                                            |
| IPI00126913, IPI00464208                            | ATPase family, AAA domain containing 3A                                                                                                                                                                                                                           |
| IPI00127598, IPI00331463                            | ATPase inhibitory factor 1                                                                                                                                                                                                                                        |
| IPI00880712, IPI00880589, IPI00880341, IPI00357510, | AU RNA binding protein/enoyl-coenzyme A hydratase                                                                                                                                                                                                                 |
| IPI00357511, IPI00124900                            |                                                                                                                                                                                                                                                                   |
| IPI00606647, IPI00321499                            | BCL2-like 13 (apoptosis facilitator)                                                                                                                                                                                                                              |
| IPI00128346                                         | CDGSH iron sulfur domain 1                                                                                                                                                                                                                                        |
| IPI00345740, IPI00649328, IPI00649725               | CDGSH iron sulfur domain 3                                                                                                                                                                                                                                        |
| IPI00222203, IPI00874655, IPI00267596               | COX15 homolog, cytochrome c oxidase assembly protein (yeast)                                                                                                                                                                                                      |
| IPI00830383, IPI00830273, IPI00467840, IPI00830443  | ClpB caseinolytic peptidase B homolog (E. coli)                                                                                                                                                                                                                   |
| IPI00128261                                         | Cytochrome b                                                                                                                                                                                                                                                      |
| IPI00130376, IPI00355248                            | Cytochrome c oxidase subunit 1                                                                                                                                                                                                                                    |
| IPI00116896                                         | Cytochrome c oxidase subunit 3; ATP synthase subunit a; ATP synthase protein 8                                                                                                                                                                                    |
| IPI00347634, IPI00120414, IPI00279858               | DnaJ (Hsp40) homolog, subfamily A, member 3                                                                                                                                                                                                                       |
| IPI00648191, IPI00226466, IPI00828649               | DnaJ (Hsp40) homolog, subfamily C, member 11                                                                                                                                                                                                                      |
| IPI00624902, IPI00468992, IPI00111111, IPI00881254  | DnaJ (Hsp40) homolog, subfamily C, member 19                                                                                                                                                                                                                      |
| IPI00137424                                         | ECSIT homolog (Drosophila)                                                                                                                                                                                                                                        |
| IPI00828369, IPI00474134, IPI00153350               | FAD-dependent oxidoreductase domain containing 1                                                                                                                                                                                                                  |
| IPI00267299, IPI00460703                            | FAST kinase domains 2                                                                                                                                                                                                                                             |
| IPI00881994, IPI00230283                            | G elongation factor, mitochondrial 1                                                                                                                                                                                                                              |
| IPI00338876, IPI00269240                            | G elongation factor, mitochondrial 2                                                                                                                                                                                                                              |
| IPI00622170, IPI00225294, IPI00336569               | GUF1 GTPase homolog (S. cerevisiae)                                                                                                                                                                                                                               |
| IPI00117083                                         | GrpE-like 1, mitochondrial                                                                                                                                                                                                                                        |
| IPI00115598, IPI00230550                            | H2-K region expressed gene 6                                                                                                                                                                                                                                      |
| IPI00331517                                         | HIG1 domain family, member 1A                                                                                                                                                                                                                                     |
| IPI00170051, IPI00881059                            | HscB iron-sulfur cluster co-chaperone homolog (E. coli)                                                                                                                                                                                                           |
| IPI00110578, IPI00856218, IPI00856829               | IscU iron-sulfur cluster scaffold homolog (E. coli); similar to nitrogen fixation cluster-like                                                                                                                                                                    |
| IPI00130331                                         | L-2-hydroxyglutarate dehydrogenase; predicted gene 7842                                                                                                                                                                                                           |
| IPI00471097                                         | LYR motif containing 5                                                                                                                                                                                                                                            |
| IPI00117832, IPI00918067                            | LYR motif containing 7                                                                                                                                                                                                                                            |
| IPI00122740                                         | MACRO domain containing 1                                                                                                                                                                                                                                         |
| IPI00123276                                         | MOCO sulphurase C-terminal domain containing 2                                                                                                                                                                                                                    |
| IPI00222753                                         | MTERF domain containing 3                                                                                                                                                                                                                                         |
| IPI00116748                                         | NADH dehydrogenase (ubiquinone) 1 alpha subcomplex 1C                                                                                                                                                                                                             |
| IPI00318645                                         | NADH dehydrogenase (ubiquinone) 1 alpha subcomplex 11                                                                                                                                                                                                             |
| IPI00344004                                         | NADH dehydrogenase (ubiquinone) 1 alpha subcomplex, 12                                                                                                                                                                                                            |
| IPI00230715                                         | NADH dehydrogenase (ubiquinone) 1 alpha subcomplex, 13                                                                                                                                                                                                            |
| IPI00315302                                         | NADH dehydrogenase (ubiquinone) 1 alpha subcomplex, 2                                                                                                                                                                                                             |
| IPI00858238, IPI00132216                            | NADH dehydrogenase (ubiquinone) 1 alpha subcomplex, 3                                                                                                                                                                                                             |
| IPI00125929                                         | NADH dehydrogenase (ubiquinone) 1 alpha subcomplex, 4                                                                                                                                                                                                             |
| IPI00880753, IPI00331332                            | NADH dehydrogenase (ubiquinone) 1 alpha subcomplex, 5                                                                                                                                                                                                             |
| IPI00133399                                         | NADH dehydrogenase (ubiquinone) 1 alpha subcomplex, 6 (B14)                                                                                                                                                                                                       |
| IPI00130322                                         | NADH dehydrogenase (ubiquinone) 1 alpha subcomplex, 7 (B14.5a)                                                                                                                                                                                                    |

IPI00120984  
 IPI00120212  
 IPI00226687  
 IPI00330551  
 IPI00648625, IPI00133744  
 IPI00133403  
 IPI00132390  
 IPI00387430  
 IPI00880613, IPI00121288  
 IPI00881846, IPI00881750, IPI00882364, IPI00132531, IPI00882043  
 IPI00648743, IPI00341322  
 IPI00133215  
 IPI00132623  
 IPI00133006, IPI00918301, IPI00918079  
 IPI00132050, IPI00110825  
  
 IPI00308882  
 IPI00830766, IPI00128023, IPI00830872  
 IPI00229008  
 IPI00649019, IPI00117300  
 IPI00120232  
 IPI00170093  
 IPI00130460  
 IPI00169925, IPI00845716  
 IPI00128285  
 IPI00341550  
 IPI00116843  
 IPI00881776  
 IPI00265701  
 IPI00407938, IPI00133608  
 IPI00111512  
 IPI00857491, IPI00857001, IPI00457976  
 IPI00650052, IPI00649794, IPI00895414, IPI00117264, IPI00894710, IPI00894598, IPI00649406, IPI00895518, IPI00648764, IPI00894769  
 IPI00133706  
 IPI00850133, IPI00900458, IPI00762463  
 IPI00108431, IPI00785241, IPI00918883  
 IPI00132478  
 IPI00113080  
 IPI00459357  
 IPI00654397, IPI00133220, IPI00458085, IPI00109206, IPI00170212  
 IPI00113143  
 IPI00110460, IPI00869373  
 IPI00750687, IPI00222284  
 IPI00270788  
 IPI00153792  
 IPI00880887, IPI00173167  
 IPI00895415, IPI00453792  
 IPI00221782  
 IPI00308195, IPI00416621, IPI00856408, IPI00857151  
 IPI00856512, IPI00267983  
 IPI00221850  
 IPI00228106  
 IPI00471368  
 IPI00761959, IPI00515530  
 IPI00132762  
 IPI00113052, IPI00885494  
 IPI00136555  
 IPI00132696, IPI00788370  
 IPI00226414, IPI00886271, IPI00404935  
 IPI00858299, IPI00170213  
 IPI00154054  
 IPI00226430, IPI00653158  
 IPI00624175  
 IPI00116074  
 IPI00122633  
 IPI00654091, IPI00762636  
  
 NADH dehydrogenase (ubiquinone) 1 alpha subcomplex, 8  
 NADH dehydrogenase (ubiquinone) 1 alpha subcomplex, 9  
 NADH dehydrogenase (ubiquinone) 1 alpha subcomplex, assembly factor 1  
 NADH dehydrogenase (ubiquinone) 1 alpha subcomplex, assembly factor 2  
 NADH dehydrogenase (ubiquinone) 1 alpha subcomplex, assembly factor 4  
 NADH dehydrogenase (ubiquinone) 1 beta subcomplex 3; predicted gene 3192  
 NADH dehydrogenase (ubiquinone) 1 beta subcomplex 4; predicted gene 3873; predicted gene 3244  
 NADH dehydrogenase (ubiquinone) 1 beta subcomplex 8  
 NADH dehydrogenase (ubiquinone) 1 beta subcomplex, 10  
 NADH dehydrogenase (ubiquinone) 1 beta subcomplex, 5  
  
 NADH dehydrogenase (ubiquinone) 1 beta subcomplex, 6  
 NADH dehydrogenase (ubiquinone) 1 beta subcomplex, 7  
 NADH dehydrogenase (ubiquinone) 1 beta subcomplex, 9  
 NADH dehydrogenase (ubiquinone) 1, alpha/beta subcomplex, 1; predicted gene 4455  
 NADH dehydrogenase (ubiquinone) 1, subcomplex unknown, 2; similar to NADH dehydrogenase (ubiquinone) 1, subcomplex unknown, 2  
 NADH dehydrogenase (ubiquinone) Fe-S protein 1  
 NADH dehydrogenase (ubiquinone) Fe-S protein 2  
 NADH dehydrogenase (ubiquinone) Fe-S protein 4  
 NADH dehydrogenase (ubiquinone) Fe-S protein 5; cDNA sequence BC002163  
 NADH dehydrogenase (ubiquinone) Fe-S protein 7  
 NADH dehydrogenase (ubiquinone) Fe-S protein 8  
 NADH dehydrogenase (ubiquinone) flavoprotein 1  
 NADH dehydrogenase (ubiquinone) flavoprotein 2  
 NADH dehydrogenase (ubiquinone) flavoprotein 3  
 NADH-ubiquinone oxidoreductase chain 1  
 NADH-ubiquinone oxidoreductase chain 4L; NADH-ubiquinone oxidoreductase chain 4  
 NFU1 iron-sulfur cluster scaffold homolog (*S. cerevisiae*); predicted gene 7855  
 NLR family member X1  
 OCIA domain containing 1  
 OMA1 homolog, zinc metallopeptidase (*S. cerevisiae*)  
 PET112-like (yeast)  
 Parkinson disease (autosomal recessive, early onset) 7  
  
 RAB1B, member RAS oncogene family  
 RIKEN cDNA 1300010F03 gene  
 RIKEN cDNA 1500001M20 gene  
 RIKEN cDNA 1700021F05 gene  
 RIKEN cDNA 1700034H14 gene  
 RIKEN cDNA 1700034I23 gene; predicted gene 10731  
 RIKEN cDNA 1810020G14 gene; synaptojanin 2 binding protein; predicted gene 4116  
  
 RIKEN cDNA 2010107E04 gene  
 RIKEN cDNA 2310003L22 gene  
 RIKEN cDNA 2310005E10 gene  
 RIKEN cDNA 2310028O11 gene  
 RIKEN cDNA 2410015M20 gene  
 RIKEN cDNA 2410091C18 gene  
 RIKEN cDNA 4930402E16 gene  
 RIKEN cDNA 4933403F05 gene  
 RIKEN cDNA 9030617O03 gene  
 RIKEN cDNA 9330129D05 gene  
 RIKEN cDNA 9430016H08 gene  
 RIKEN cDNA A230051G13 gene  
 RNA (guanine-9-) methyltransferase domain containing 1  
 SCO cytochrome oxidase deficient homolog 1 (yeast)  
 TNF receptor-associated protein 1  
 Ts translation elongation factor, mitochondrial  
 YME1-like 1 (*S. cerevisiae*)  
 aarF domain containing kinase 1  
 abhydrolase domain containing 10  
 abhydrolase domain containing 11  
 acetyl-Coenzyme A acetyltransferase 1  
 acetyl-Coenzyme A acyltransferase 2 (mitochondrial 3-oxoacyl-Coenzyme A thiolase  
 acid phosphatase 6, lysophosphatidic  
 aconitase 2, mitochondrial  
 acyl-CoA synthetase family member 2  
 acyl-CoA synthetase family member 2

IPI00856216, IPI00112549, IPI00857822, IPI00556840,  
 IPI00856996, IPI00857226  
 IPI00915057, IPI00651798, IPI00169772  
 IPI00469942  
 IPI00115871  
 IPI00127260  
 IPI00132958  
 IPI00653566, IPI00136683  
 IPI00314069  
 IPI00170013  
 IPI00274222  
 IPI00759881, IPI00331710, IPI00857619  
 IPI00119114, IPI00894588  
 IPI00895545, IPI00134961, IPI00894719  
 IPI00885762, IPI00116591, IPI00331251  
 IPI00880948, IPI00119842  
 IPI00119203, IPI00649885  
 IPI00409360, IPI00404355, IPI00828479, IPI00127558  
 IPI00128209, IPI00750256, IPI00752998  
 IPI00221769, IPI00918523  
 IPI00227186, IPI00889240  
 IPI00113073  
 IPI00169472, IPI00858223  
 IPI00111218, IPI00858077  
 IPI00405699  
 IPI00124372  
 IPI00461964  
 IPI00230084, IPI00890092  
 IPI00273164  
 IPI00224181  
 IPI00119458  
 IPI00756601, IPI00223818  
 IPI00607025, IPI00114331  
 IPI00874359, IPI00121287, IPI00918663  
 IPI00170307  
 IPI00112493, IPI00874376, IPI00828758  
 IPI00776047, IPI00129577  
 IPI00648997, IPI00323177  
 IPI00857459, IPI00312759  
 IPI00895398, IPI00273767  
 IPI00623838, IPI00320462, IPI00458522  
 IPI00131896  
 IPI00886333, IPI00122442, IPI00886399, IPI00885905  
 IPI00331555  
 IPI00661338, IPI00115302, IPI00653144  
 IPI00849134  
 IPI00128642, IPI00648012  
 IPI00127227, IPI00895535  
 IPI00856889, IPI00757912, IPI00875497, IPI00113347,  
 IPI00856855  
 IPI00330094  
 IPI00136563  
 IPI00881401, IPI00649655, IPI00649159, IPI00648887,  
 IPI00131424  
 IPI00788396, IPI00119808  
 IPI00133270  
 IPI00869393, IPI00312058, IPI00755311  
 IPI00113517  
 IPI00404551, IPI00111013, IPI00881091  
 IPI00856199, IPI00857970, IPI00760070, IPI00117829  
 IPI00122554  
 IPI00331174  
 IPI00153903, IPI00874574, IPI00474485  
 IPI00113141  
 IPI00118825  
 IPI00649850, IPI00169916, IPI00648173  
 IPI00467124  
 IPI00379695, IPI00886214  
 IPI00857727, IPI00222526, IPI00856308, IPI00894987  
 IPI00169862  
 IPI00655156, IPI00353887

acyl-CoA synthetase long-chain family member 1  
 acyl-CoA synthetase long-chain family member 2  
 acyl-CoA synthetase short-chain family member 1  
 acyl-CoA thioesterase 1  
 acyl-CoA thioesterase 10  
 acyl-CoA thioesterase 13  
 acyl-CoA thioesterase 2  
 acyl-CoA thioesterase 9  
 acyl-Coenzyme A dehydrogenase family, member 10  
 acyl-Coenzyme A dehydrogenase family, member 11  
 acyl-Coenzyme A dehydrogenase family, member 12  
 acyl-Coenzyme A dehydrogenase, long-chain  
 acyl-Coenzyme A dehydrogenase, medium chain  
 acyl-Coenzyme A dehydrogenase, short chain  
 acyl-Coenzyme A dehydrogenase, short/branched chain  
 acyl-Coenzyme A dehydrogenase, very long chain  
 acyl-Coenzyme A oxidase 1, palmitoyl  
 adenylate kinase 1  
 adenylate kinase 3  
 alcohol dehydrogenase, iron containing, 1  
 aldehyde dehydrogenase 1 family, member B1  
 aldehyde dehydrogenase 1 family, member L2  
 aldehyde dehydrogenase 2, mitochondrial  
 aldehyde dehydrogenase 4 family, member A1  
 aldehyde dehydrogenase 9, subfamily A1  
 aldehyde dehydrogenase family 6, subfamily A1  
 aldehyde dehydrogenase family 7, member A1  
 aldehyde dehydrogenase family 5, subfamily A1  
 aldo-keto reductase family 1, member B7  
 aldolase C, fructose-bisphosphate  
 alkylglycerone phosphate synthase  
 alpha-methylacyl-CoA racemase  
 aminolevulinic acid synthase 1  
 apolipoprotein A-I binding protein  
 apolipoprotein O-like  
 apoptosis-inducing factor, mitochondrion-associated 1  
 arginyl-tRNA synthetase 2, mitochondrial  
 asparaginyl-tRNA synthetase 2 (mitochondrial)(putative)  
 aspartyl-tRNA synthetase 2 (mitochondrial)  
 biphenyl hydrolase-like (serine hydrolase, breast epithelial mucin-associated antigen  
 brain protein 44; similar to brain protein 44; predicted gene 3982  
 branched chain aminotransferase 2, mitochondrial  
 branched chain ketoacid dehydrogenase E1, alpha polypeptide  
 branched chain ketoacid dehydrogenase E1, beta polypeptide; similar to 3-methyl-2-oxobutanoate dehydrogenase  
 cDNA sequence AK157302  
 carbonyl reductase 2  
 carbonyl reductase 4  
 carnitine acetyltransferase  
  
 carnitine palmitoyltransferase 1a, liver  
 carnitine palmitoyltransferase 1b, muscle  
 carnitine palmitoyltransferase 2  
  
 caseinolytic peptidase X (E.coli)  
 caseinolytic peptidase, ATP-dependent, proteolytic subunit homolog (E. coli)  
 catalase  
 cathepsin B  
 cathepsin D  
 caveolin 1, caveolae protein  
 chaperone, ABC1 activity of bc1 complex like (S. pombe)  
 chaperonin containing Tcp1, subunit 7 (eta)  
 citrate lyase beta like  
 citrate synthase  
 citrate synthase like  
 clathrin, heavy polypeptide (Hc)  
 coenzyme Q3 homolog, methyltransferase (yeast)  
 coenzyme Q5 homolog, methyltransferase (yeast)  
 coenzyme Q6 homolog (yeast)  
 coenzyme Q9 homolog (yeast)  
 coiled-coil domain containing 109A

IPI00137601  
 IPI00153794  
 IPI00854928, IPI00110180, IPI00854953  
 IPI00754739, IPI00133562, IPI00757033  
 IPI00124389  
 IPI00775783, IPI00132799  
 IPI00400301  
 IPI00128296  
 IPI00120076  
 IPI00857487, IPI00454201, IPI00845690  
 IPI00896595  
 IPI00119685  
 IPI00119131, IPI00127437  
 IPI00759904, IPI00121079  
 IPI00117978  
 IPI00120136  
 IPI00320238  
 IPI00113196  
 IPI00225390  
 IPI00120719  
 IPI00113203  
 IPI00230033  
 IPI00845772, IPI00132728  
 IPI00275050, IPI00402997  
 IPI00331549  
 IPI00318750  
 IPI00653062, IPI00125592  
 IPI00153660  
 IPI00845858, IPI00134809  
 IPI00890234, IPI00130535  
 IPI00331564, IPI00874456  
 IPI00918852, IPI00919031, IPI00919119, IPI00130733,  
 IPI00919285, IPI00403712  
 IPI00114416, IPI00331692  
 IPI00121322, IPI00882287  
 IPI00318283, IPI00753211  
 IPI00886151, IPI00454049, IPI00459020  
 IPI00130804, IPI00895351  
 IPI00554834, IPI00127276  
 IPI00113386  
 IPI00109611  
 IPI00649589, IPI00387249, IPI00875631  
 IPI00453981  
 IPI00228343, IPI00608064  
 IPI00856326, IPI00132217, IPI00857192  
 IPI00136201  
 IPI00129928, IPI00759940  
 IPI00468850, IPI00653743  
 IPI00121218  
 IPI00115827, IPI00651782  
 IPI00606398, IPI00114209  
 IPI00117312  
 IPI00120233, IPI00885605, IPI00788331  
 IPI00121051  
 IPI00876504, IPI00126120  
 IPI00135446, IPI00404687, IPI00654090, IPI00224993  
 IPI00123975  
 IPI00876084, IPI00331182  
 IPI00230185  
 IPI00112555  
 IPI00831130, IPI00110721, IPI00112630  
 IPI00410978  
 IPI00126721  
 IPI00263863, IPI00120045  
  
 IPI00133208  
 IPI00387494, IPI00331546  
 IPI00880839, IPI00133903  
 IPI00554929, IPI00229080  
 IPI00117281, IPI00660262, IPI00463220, IPI00227783

coiled-coil domain containing 44  
 coiled-coil domain containing 58  
 coiled-coil domain containing 90A  
 coiled-coil-helix-coiled-coil-helix domain containing 3; similar to coiled-coil-helix-coiled-coil-helix domain containing  
 coiled-coil-helix-coiled-coil-helix domain containing 4  
 complement component 1, q subcomponent binding protein  
 coproporphyrinogen oxidase  
 creatine kinase, mitochondrial 1, ubiquitous  
 creatine kinase, mitochondrial 2  
 cysteine conjugate-beta lyase 2  
 cysteinyl-tRNA synthetase 2 (mitochondrial)(putative)  
 cytochrome P450, family 27, subfamily a, polypeptide 1  
 cytochrome b5 reductase 1  
 cytochrome b5 reductase 3  
 cytochrome c oxidase subunit IV isoform 1  
 cytochrome c oxidase subunit VIIa polypeptide 2-like; predicted gene 6965  
 cytochrome c oxidase, subunit VI a, polypeptide 2  
 cytochrome c oxidase, subunit VIIa 1  
 cytochrome c oxidase, subunit VIIb polypeptide 1  
 cytochrome c oxidase, subunit Va  
 cytochrome c oxidase, subunit XVII assembly protein homolog (yeast  
 cytochrome c, testis  
 cytochrome c-1  
 death associated protein 3  
 dehydrogenase/reductase (SDR family) member 1  
 dehydrogenase/reductase (SDR family) member 4  
 demethyl-Q 7  
 dihydrolipoamide S-acetyltransferase (E2 component of pyruvate dehydrogenase complex  
 dihydrolipoamide S-succinyltransferase (E2 component of 2-oxo-glutarate complex  
 dihydrolipoamide branched chain transacylase E2  
 dihydrolipoamide dehydrogenase  
 dihydroorotate dehydrogenase  
  
 dodecenoyl-Coenzyme A delta isomerase (3,2 trans-enoyl-Coenzyme A isomerase  
 electron transferring flavoprotein, dehydrogenase  
 enoyl Coenzyme A hydratase domain containing 3  
 enoyl Coenzyme A hydratase, short chain, 1, mitochondria  
 enoyl coenzyme A hydratase 1, peroxisoma  
 enoyl-Coenzyme A, hydratase/3-hydroxyacyl Coenzyme A dehydrogenase  
 ethylmalonic encephalopathy 1  
 family with sequence similarity 162, member A  
 family with sequence similarity 82, member B  
 ferredoxin reductase  
 ferrochelataase  
 fission 1 (mitochondrial outer membrane) homolog (yeast)  
 frataxin  
 fumarate hydratase 1  
 fumarylacetoacetate hydrolase domain containing 1  
 fumarylacetoacetate hydrolase domain containing 2A  
 glioblastoma amplified sequence  
 glutamate dehydrogenase 1; predicted gene 5902  
 glutamate oxaloacetate transaminase 2, mitochondrial  
 glutaryl-Coenzyme A dehydrogenase  
 glutathione S-transferase kappa 1  
 glutathione transferase zeta 1 (maleylacetoacetate isomerase)  
 glycerol kinase  
 glycerol kinase 2  
 glycerol phosphate dehydrogenase 2, mitochondrial  
 glycerol-3-phosphate dehydrogenase 1 (soluble)  
 glycyl-tRNA synthetase  
 glyoxalase domain containing 4  
 growth factor, erv1 (S. cerevisiae)-like (augmenter of liver regeneration)  
 growth hormone inducible transmembrane protein  
 heat shock protein 1 (chaperonin 10); predicted gene, EG628438; heat shock protein 1 (chaperonin 10), related sequence 1;  
 predicted gene 2903  
 heat shock protein 1B; heat shock protein 1A; heat shock protein 1-like  
 heat shock protein 2  
 heat shock protein 9  
 heat shock protein 90 alpha (cytosolic), class B member 1  
 heterogeneous nuclear ribonucleoprotein L-like; glutathione peroxidase 4

IPI00762858, IPI00283612, IPI00759938, IPI00468553,  
 IPI00283611  
 IPI00114342  
 IPI00133034  
 IPI00116138  
 IPI00134572, IPI00309285  
 IPI00880410, IPI00880581, IPI00115866, IPI00882305  
 IPI00121105  
 IPI00223092  
  
 IPI00320847, IPI00830581, IPI00626132  
 IPI00331628  
 IPI00649718, IPI00117214  
 IPI00133350, IPI00894954, IPI00894692  
 IPI00555088, IPI00381412, IPI00228150, IPI00381413,  
 IPI00554845  
 IPI00119784, IPI00828796, IPI00407289  
 IPI00720014  
 IPI00857308, IPI00318614, IPI00875110  
 IPI00608078, IPI00459725  
 IPI00126635  
 IPI00109169  
 IPI00453499, IPI00830173, IPI00720234  
 IPI00471246  
 IPI00280156, IPI00229510, IPI00776197  
 IPI00885799, IPI00885728, IPI00830170, IPI00169752  
 IPI00331436, IPI00828469  
 IPI00131177  
 IPI00875457, IPI00420706  
 IPI00123138  
 IPI00761408, IPI00319518  
 IPI00130018, IPI00831119, IPI00400117, IPI00831019  
 IPI00336324, IPI00649695  
 IPI00323592  
 IPI00308976, IPI00415361  
 IPI00759857, IPI00114866  
 IPI00225254, IPI00874889  
 IPI00475322, IPI00331442  
 IPI00109655  
 IPI00652521, IPI00881206, IPI00320850  
 IPI00134792, IPI00553717  
 IPI00122862  
  
 IPI00312720  
 IPI00750681, IPI00653086, IPI00283203  
 IPI00133776  
 IPI00133553, IPI00850737  
 IPI00330688  
 IPI00122075  
 IPI00894752, IPI00132039, IPI00807902, IPI00750596  
 IPI00222838, IPI00753039  
 IPI00459344  
 IPI00720216, IPI00118237  
 IPI00132412, IPI00648692  
 IPI00132470  
 IPI00118963  
 IPI00134011  
 IPI00798614, IPI00131732  
 IPI00118230  
 IPI00271726, IPI00919171  
 IPI00857677, IPI00118235, IPI00856509  
 IPI00858168, IPI00311406  
 IPI00881504, IPI00323669  
 IPI00665641, IPI00607969  
 IPI00132895, IPI00474272, IPI00856299  
 IPI00111211  
 IPI00322422  
 IPI00274131, IPI00874379  
 IPI00131988, IPI00271430  
 IPI00132170  
 IPI00654010, IPI00284978  
  
 hexokinase 1  
  
 hexokinase 2  
 histidine triad nucleotide binding protein 2  
 histidyl-tRNA synthetase 2, mitochondrial (putative)  
 holocytochrome c synthetase  
 hydroxyacyl glutathione hydrolase  
 hydroxyacyl-Coenzyme A dehydrogenase  
 hydroxyacyl-Coenzyme A dehydrogenase/3-ketoacyl-Coenzyme A thiolase/enoyl-Coenzyme A hydratase (trifunctional protein), alpha subunit  
 hydroxysteroid (17-beta) dehydrogenase 1C  
 hydroxysteroid (17-beta) dehydrogenase 4  
 hydroxysteroid dehydrogenase like 2  
 hypothetical protein LOC675054; RIKEN cDNA 2900010M23 gene  
 inner membrane protein, mitochondrial  
  
 insulin degrading enzyme  
 iron-sulfur cluster assembly 1 homolog (*S. cerevisiae*)  
 isocitrate dehydrogenase 2 (NADP+), mitochondrial  
 isocitrate dehydrogenase 3 (NAD+) alpha  
 isocitrate dehydrogenase 3 (NAD+) beta  
 isocitrate dehydrogenase 3 (NAD+), gamma  
 isoleucine-tRNA synthetase 2, mitochondrial; similar to isoleucine-tRNA synthetase 2, mitochondria  
 isovaleryl coenzyme A dehydrogenase  
 lactate dehydrogenase B; predicted gene 5514  
 lactation elevated 1  
 leucine aminopeptidase 3  
 leucine zipper-EF-hand containing transmembrane protein 1  
 leucine-rich PPR-motif containing  
 leucyl-tRNA synthetase, mitochondrial  
 lon peptidase 1, mitochondrial  
 lysophospholipase 1  
 malate dehydrogenase 1, NAD (soluble)  
 malate dehydrogenase 2, NAD (mitochondrial)  
 malic enzyme 3, NADP(+)-dependent, mitochondrial  
 malonyl-CoA decarboxylase  
 metaxin 2  
 methionine sulfoxide reductase A  
 methionine sulfoxide reductase B2  
 methylcrotonoyl-Coenzyme A carboxylase 1 (alpha  
 methylcrotonoyl-Coenzyme A carboxylase 2 (beta  
 methylenetetrahydrofolate dehydrogenase (NADP+ dependent), methylenetetrahydrofolate cyclohydrolase,  
 formyltetrahydrofolate synthase  
 methylmalonic aciduria (cobalamin deficiency) type A  
 methylmalonic aciduria (cobalamin deficiency) type B homolog (human  
 methylmalonyl CoA epimerase  
 methylmalonyl-Coenzyme A mutase  
 mitochondrial ribosomal protein S7  
 mitochondrial antiviral signaling protein  
 mitochondrial carrier homolog 2 (*C. elegans*); predicted gene, 100039384; predicted gene, 100039506  
 mitochondrial intermediate peptidase; similar to Mipep protein  
 mitochondrial poly(A) polymerase  
 mitochondrial ribosomal protein L1  
 mitochondrial ribosomal protein L10  
 mitochondrial ribosomal protein L11  
 mitochondrial ribosomal protein L12  
 mitochondrial ribosomal protein L13  
 mitochondrial ribosomal protein L15  
 mitochondrial ribosomal protein L16  
 mitochondrial ribosomal protein L28  
 mitochondrial ribosomal protein L3  
 mitochondrial ribosomal protein L39  
 mitochondrial ribosomal protein L40  
 mitochondrial ribosomal protein L44  
 mitochondrial ribosomal protein L45  
 mitochondrial ribosomal protein L46  
 mitochondrial ribosomal protein L47  
 mitochondrial ribosomal protein L48  
 mitochondrial ribosomal protein L49; similar to mitochondrial ribosomal protein L45  
 mitochondrial ribosomal protein L51  
 mitochondrial ribosomal protein L9



IPI00895548, IPI00895482, IPI00348248, IPI00895361  
 IPI00321858  
 IPI00320963, IPI00880873, IPI00556725  
 IPI00223360, IPI00118193  
 IPI00110918  
 IPI00649272, IPI00882119, IPI00882252, IPI00515295,  
 IPI00754363, IPI00853715, IPI00284934  
 IPI00222514, IPI00462763  
 IPI00110672  
 IPI00132504  
 IPI00124828  
 IPI00894878, IPI00222538  
 IPI00269020  
 IPI00461565, IPI00855075, IPI00336292  
 IPI00109501  
 IPI00648884, IPI00121276  
 IPI00776049, IPI00649361, IPI00649863, IPI00551118,  
 IPI00649625, IPI00130227  
 IPI00649455, IPI00308263, IPI00649724  
 IPI00653064, IPI00881102, IPI00881801, IPI00135579  
 IPI00226140  
 IPI00121107  
 IPI00894940, IPI00407962, IPI00330747  
 IPI00314829, IPI00405682, IPI00874680  
 IPI00115459, IPI00858044  
 IPI00762127, IPI00874685, IPI00875011, IPI00830812  
 IPI00119945  
 IPI00760006, IPI00311072  
 IPI00807996, IPI00110522  
 IPI00312507  
 IPI00129178  
 IPI00308001  
 IPI00123765, IPI00857222  
 IPI00460118, IPI00719841, IPI00845652, IPI00626237,  
 IPI00420882  
 IPI00126857  
 IPI00338458  
 IPI00750433, IPI00120199  
 IPI00274656  
 IPI00116228  
 IPI00649645, IPI00848536, IPI00648105, IPI00605254,  
 IPI00121788, IPI00648615  
 IPI00116192  
 IPI00828909  
 IPI00475031, IPI00759999, IPI00129517  
 IPI00322931, IPI00877214  
 IPI00459332, IPI00720114, IPI00387505  
 IPI00788337, IPI00788353, IPI00170126  
 IPI00654405, IPI00117689  
 IPI00315808  
  
 IPI00222419, IPI00265239  
 IPI00133342, IPI00876323  
  
 IPI00136505, IPI00623553, IPI00881799, IPI00230507  
  
 IPI00116222  
 IPI00110524, IPI00848762, IPI00659536  
 IPI00111877, IPI00408243  
 IPI00308885, IPI00853695, IPI00830313, IPI00845678,  
 IPI00461249  
 IPI00118196, IPI00894830  
 IPI00666165, IPI00125035, IPI00648501, IPI00649018,  
 IPI00651878  
 IPI00858282, IPI00474281, IPI00115607, IPI00850941  
  
 IPI00115040, IPI00850545, IPI00677484  
  
 mitochondrial ribosomal protein S10  
 mitochondrial ribosomal protein S15  
 mitochondrial ribosomal protein S18A  
 mitochondrial ribosomal protein S18B  
 mitochondrial ribosomal protein S22  
 mitochondrial ribosomal protein S23; similar to Mrps23 protein  
  
 mitochondrial ribosomal protein S27  
 mitochondrial ribosomal protein S28  
 mitochondrial ribosomal protein S30  
 mitochondrial ribosomal protein S31  
 mitochondrial ribosomal protein S35  
 mitochondrial ribosomal protein S6  
 mitochondrial ribosomal protein S9  
 mitochondrial ribosome recycling factor; similar to mitochondrial ribosome recycling factor; predicted gene 637  
 mitochondrial trans-2-enoyl-CoA reductase  
 mitochondrial translational initiation factor 2  
  
 mitochondrial ubiquitin ligase activator of NFKB 1  
 mitofusin 1  
 monoamine oxidase B  
 myosin, light chain 10, regulatory  
 nephronophthysis 3 (adolescent); acyl-Coenzyme A dehydrogenase family, member 1  
 neurolysin (metallopeptidase M3 family)  
 nicotinamide nucleotide adenyltransferase 3  
 nicotinamide nucleotide transhydrogenase  
 nitrilase family, member 2  
 nitrogen fixation gene 1 (S. cerevisiae); similar to Nitrogen fixation gene 1 (S. cerevisiae)  
 nudix (nucleoside diphosphate linked moiety X)-type motif 13  
 optic atrophy 3 (human)  
 ornithine aminotransferase  
 oxidase assembly 1-like  
 oxidoreductase NAD-binding domain containing 1  
 oxoglutarate dehydrogenase (lipoamide)  
  
 pentatricopeptide repeat domain 2  
 pentatricopeptide repeat domain 3  
 peptidase (mitochondrial processing) alpha  
 peptidase (mitochondrial processing) beta  
 peptidylprolyl isomerase F (cyclophilin F)  
 peroxiredoxin 1; predicted gene 7204  
  
 peroxiredoxin 3  
 peroxiredoxin 4  
 peroxiredoxin 5  
 peroxisomal delta3, delta2-enoyl-Coenzyme A isomerase  
 phenylalanine-tRNA synthetase 2 (mitochondrial)  
 pitrilysin metallopeptidase 1  
 polymerase I and transcript release factor  
 predicted gene 10078; predicted gene 3544; similar to mitochondrial ribosomal protein S36; mitochondrial ribosomal  
 protein S36; predicted gene 7258; predicted gene 4676  
 predicted gene 10108; cytochrome c, somatic; predicted gene 10053; similar to cytochrome c  
 predicted gene 10221; predicted gene 4602; predicted gene 9391; ATP synthase, H<sup>+</sup> transporting, mitochondrial FO  
 complex, subunit G2, pseudogene; predicted gene 11477; predicted gene 9712; ATP synthase, H<sup>+</sup> transporting,  
 mitochondrial FO complex, subunit g; predicted gene 4045  
 predicted gene 10250; hypothetical protein LOC676483; predicted gene 5051; ATP synthase, H<sup>+</sup> transporting,  
 mitochondrial FO complex, subunit d; predicted gene 4953; similar to ATP synthase, H<sup>+</sup> transporting, mitochondrial FO  
 complex, subunit d  
 predicted gene 11225; 3-hydroxyisobutyrate dehydrogenase  
 predicted gene 11945; predicted gene 6238; mitochondrial ribosomal protein L3C  
 predicted gene 12115; single-stranded DNA binding protein 1  
 predicted gene 12141; heat shock protein 1 (chaperonin)  
  
 predicted gene 13328; mitochondrial ribosomal protein S5  
 predicted gene 13639; similar to adenylate kinase 4; adenylate kinase 3-like 1  
  
 predicted gene 13910; similar to Hydroxyacyl-Coenzyme A dehydrogenase/3-ketoacyl-Coenzyme A thiolase/enoyl-  
 Coenzyme A hydratase (trifunctional protein), beta subunit; hydroxyacyl-Coenzyme A dehydrogenase/3-ketoacyl-Coenzyme  
 A thiolase/enoyl-Coenzyme A hydratase (trifunctional protein), beta subunit; predicted gene 910  
 predicted gene 14506; BCL2/adenovirus E1B interacting protein 3; predicted gene 6532; similar to E1B 19K/Bcl-2-binding  
 protein homolog

IPI00110385  
 IPI00116753  
 IPI00132347, IPI00555000  
 IPI00111770, IPI00875971  
 IPI00453724, IPI00556699, IPI00755768  
  
 IPI00133363  
 IPI00319731, IPI00849049, IPI00659907, IPI00874964,  
 IPI00753028, IPI00849031, IPI00850955, IPI00850432,  
 IPI00850377, IPI00462008, IPI00462075, IPI00850337,  
 IPI00620663, IPI00850243, IPI00848648, IPI00848411,  
 IPI00273646, IPI00848801, IPI00656311, IPI00850028,  
 IPI00849532, IPI00848807, IPI00762304, IPI00850062,  
 IPI00663957, IPI00848511, IPI00849530, IPI00135284,  
 IPI00753102, IPI00849050, IPI00751677, IPI00752685,  
 IPI00756025, IPI00752289, IPI00849792, IPI00849045,  
 IPI00850760, IPI00851086, IPI00271869, IPI00622795,  
 IPI00849046, IPI00850779, IPI00853668, IPI00850434  
  
 IPI00118986, IPI00919068  
  
 IPI00648759, IPI00115117, IPI00648577, IPI00649391  
 IPI00132042  
 IPI00131771, IPI00622837  
 IPI00114246  
 IPI00407130, IPI00845840  
  
 IPI00856384, IPI00271986  
  
 IPI00225318  
 IPI00128857, IPI00670735, IPI00881197  
  
 IPI00876341, IPI00122548  
 IPI00127417, IPI00379441  
  
 IPI00319994, IPI00751369, IPI00754398, IPI00756114  
 IPI00798555, IPI00113606  
 IPI00130589, IPI00135857  
 IPI00378520  
 IPI00625588, IPI00460132, IPI00274407  
 IPI00133167  
  
 IPI00124015, IPI00856157, IPI00857160  
 IPI00651865, IPI00880977, IPI00321718  
 IPI00126917, IPI00133440, IPI00649084  
 IPI00881014, IPI00322760, IPI00882128, IPI00475037  
 IPI00719901, IPI00720189, IPI00131548  
 IPI00918862, IPI00606510, IPI00918838, IPI00468653  
 IPI00330523, IPI00858257, IPI00858124  
 IPI00321190  
 IPI00312174  
 IPI00226766  
 IPI00672824, IPI00850694, IPI00857971, IPI00849866  
 IPI00408727, IPI00881534, IPI00881722, IPI00881568,  
 IPI00127050  
 IPI00114710  
 IPI00337893  
 IPI00118594  
 IPI00753072, IPI00222767, IPI00752455  
 IPI00221407, IPI00776169  
 IPI00122251  
 IPI00881473, IPI00881737, IPI00459279  
 IPI00222930, IPI00307931, IPI00515349, IPI00123186  
 IPI00875863, IPI00474370, IPI00473646  
 IPI00858050, IPI00320716  
  
 predicted gene 15683; RIKEN cDNA 2310005N03 gene; similar to RIKEN cDNA 2310005N03  
 predicted gene 2893; electron transferring flavoprotein, alpha polypeptide  
 predicted gene 2962; ubiquinol-cytochrome c reductase binding protein  
 predicted gene 2972; ATP synthase, H<sup>+</sup> transporting, mitochondrial F1F0 complex, subunit c  
 predicted gene 3672; similar to Glycine cleavage system H protein, mitochondrial precursor; glycine cleavage system  
 protein H (aminomethyl carrier)  
 predicted gene 4237; NADH dehydrogenase (ubiquinone) 1, subcomplex unknown, 1  
 predicted gene 4691; predicted gene 6944; predicted gene 10290; predicted gene 10566; predicted gene 10291; predicted  
 gene 3200; predicted gene 12070; predicted gene 7286; predicted gene 6946; predicted gene 8825; predicted gene 9081;  
 glyceraldehyde-3-phosphate dehydrogenase; predicted gene 10359; predicted gene 10358; predicted gene 7784; predicted  
 gene 12416; predicted gene 14148; predicted gene 13882; predicted gene 4217; predicted gene 7183; predicted gene 10313;  
 predicted gene 2467; predicted gene 5787; predicted gene 2193; predicted gene 13292; predicted gene 380687; predicted  
 gene 2076; predicted gene 3222; predicted gene 7507; predicted gene 7293; predicted gene 15191; predicted gene 674324;  
 predicted gene 10284; predicted gene 8055; similar to hCG1978856; predicted gene 2574; similar to glyceraldehyde-3-  
 phosphate dehydrogenase; predicted gene 7545; predicted gene 12033; predicted gene 3272; predicted gene 3534; predicted  
 gene 2308; predicted gene 3839; predicted gene 9061; predicted gene 3671; predicted gene 8513; predicted gene 4654;  
 predicted gene 12537; predicted gene 4929; predicted gene 5652; predicted gene 9568; predicted gene 8349; predicted gene  
 2546; predicted gene 7129; similar to Glyceraldehyde-3-phosphate dehydrogenase (GAPDH); predicted gene 8318;  
 glyceraldehyde-3-phosphate dehydrogenase pseudogene; predicted gene 7611; predicted gene 2445; predicted gene 6283;  
 predicted gene 11557; predicted gene 4335; predicted gene 9127; predicted gene 3695; predicted gene 5507; predicted gene  
 8174; predicted gene 4609; predicted gene 3809; predicted gene 9034; predicted gene 2606; predicted gene 4575; predicted  
 gene 12286; predicted gene 11658; predicted gene 5732; predicted gene 16374; predicted gene 8100; predicted gene 11953;  
 predicted gene, EG545741; predicted gene 2451; predicted gene 14130  
  
 predicted gene 5436; similar to ATP synthase, H<sup>+</sup> transporting, mitochondrial F1 complex, O subunit; ATP synthase, H<sup>+</sup>  
 transporting, mitochondrial F1 complex, O subunit  
 predicted gene 5626; stomatin (Epb7.2)-like 2  
 predicted gene 6123; pyruvate dehydrogenase (lipoamide) beta  
 predicted gene 6265; similar to cytochrome c oxidase, subunit VIc; cytochrome c oxidase, subunit VIc  
 predicted gene 6444; NADH dehydrogenase (ubiquinone) 1 beta subcomplex, 11  
 predicted gene 6560; predicted gene 2124; predicted gene 6992; pyruvate kinase, muscle; similar to M2-type pyruvate  
 kinase  
 predicted gene 6835; ATP synthase, H<sup>+</sup> transporting, mitochondrial F0 complex, subunit f, isoform 2; predicted gene 6581  
  
 predicted gene 6997; mitochondrial ribosomal protein L22  
 predicted gene 7049; similar to NADP-dependent malic enzyme (NADP-ME) (Malic enzyme 1); malic enzyme 1, NADP(+)-  
 dependent, cytosolic  
 predicted gene 7591; voltage-dependent anion channel 3  
 predicted gene 7730; non-metastatic cells 2, protein (NM23B) expressed in; predicted gene 5566; predicted gene 5425;  
 similar to Nucleoside diphosphate kinase B (NDK B) (NDP kinase B) (P18)  
 predicted gene 7997; lactate dehydrogenase A; predicted gene 5452  
 predicted gene 8546; acylglycerol kinase  
 predicted gene 8566; superoxide dismutase 1, soluble; similar to Superoxide dismutase  
 predicted gene 9481; mitochondrial ribosomal protein L41  
 predicted gene 9755; Tu translation elongation factor, mitochondrial  
 predicted gene 9803; mitochondria-associated protein involved in granulocyte-macrophage colony-stimulating factor signal  
 transduction  
 presenilin associated, rhomboid-like  
 prohibitin 2  
 prohibitin; predicted gene 4773; RIKEN cDNA 1700071K01 gene  
 proline dehydrogenase  
 proline synthetase co-transcribed  
 propionyl Coenzyme A carboxylase, beta polypeptide  
 propionyl-Coenzyme A carboxylase, alpha polypeptide  
 prosaposin  
 prostaglandin E synthase 2  
 protein phosphatase 1K (PP2C domain containing)  
 protein phosphatase 2C, magnesium dependent, catalytic subunit  
 pyrophosphatase (inorganic) 2  
  
 pyruvate carboxylase  
 pyruvate dehydrogenase E1 alpha 1  
 pyruvate dehydrogenase E1 alpha 2  
 pyruvate dehydrogenase complex, component X; similar to pyruvate dehydrogenase complex, component X  
 pyruvate dehydrogenase kinase, isoenzyme 1  
 pyruvate dehydrogenase kinase, isoenzyme 2  
 quinoid dihydropteridine reductase; similar to Quinoid dihydropteridine reductase  
 ras homolog gene family, member T1  
 ras homolog gene family, member T2  
 reticulon 4 interacting protein 1

IPI00895515, IPI00229040, IPI00857145  
IPI00129164  
IPI00318006  
IPI00454008  
IPI00109354  
IPI00170357, IPI00850215  
IPI00225288, IPI00471416  
IPI00848492, IPI00121440, IPI00757916  
IPI00121309, IPI00475158

IPI00673568, IPI00886222, IPI00128345, IPI00674389

IPI00653905, IPI00757305, IPI00830434, IPI00850402,  
IPI00153266  
IPI00850430, IPI00124771

IPI00553262, IPI00480233  
IPI00753287, IPI00122547, IPI00750490

IPI00269076, IPI00648318  
IPI00848729, IPI00918701, IPI00124292  
IPI00315794  
IPI00111255, IPI00850715  
IPI00785410, IPI00116154  
IPI00133284  
IPI00109293, IPI00890317  
IPI00469103  
IPI00342938  
IPI00894705, IPI00857674, IPI00312244, IPI00649816,  
IPI00415517, IPI00816883, IPI00894813  
IPI00855011, IPI00117657, IPI00918906, IPI00918980,  
IPI00918878, IPI00403336, IPI00919056  
IPI00321923, IPI00556889  
IPI00169883  
IPI00137194  
IPI00131584  
IPI00230754, IPI00648357, IPI00648119  
IPI00308162  
IPI00135651  
IPI00115564  
IPI00127841, IPI00658303

IPI00885254, IPI00276926  
IPI00317074  
IPI00756073, IPI00754831, IPI00109275, IPI00856458,  
IPI00754329  
IPI00849619, IPI00226854  
IPI00320503  
IPI00387392, IPI00652424  
IPI00221608  
IPI00830372, IPI00830269, IPI00170128, IPI00830563  
IPI00123129  
IPI00648476, IPI00648299, IPI00134131, IPI00648007  
IPI00230351  
IPI00338536  
IPI00831418, IPI00319111  
IPI00406442  
IPI00261627  
IPI00665996, IPI00459487  
IPI00750524, IPI00313998  
IPI00153144  
IPI00109109  
IPI00314919  
IPI00119022  
IPI00187402, IPI00651932  
IPI00125652, IPI00828588  
IPI00471266, IPI00350590, IPI00124699, IPI00271280  
IPI00223216, IPI00762128  
IPI00895166, IPI00112822, IPI00895392, IPI00230512

retinol dehydrogenase 13 (all-trans and 9-cis)  
sepiapterin reductase  
serine hydrolase-like  
serine hydroxymethyltransferase 2 (mitochondrial)  
seryl-aminoacyl-tRNA synthetase 2  
similar to AFG3(ATPase family gene 3)-like 2 (yeast); AFG3(ATPase family gene 3)-like 2 (yeast)  
similar to Coiled-coil domain containing 90B; coiled-coil domain containing 90B  
similar to Electron transferring flavoprotein, beta polypeptide; electron transferring flavoprotein, beta polypeptid  
similar to NADH dehydrogenase (ubiquinone) Fe-S protein 3; NADH dehydrogenase (ubiquinone) Fe-S protein 3; predicted  
gene 12251  
similar to NADH dehydrogenase (ubiquinone) Fe-S protein 6; NADH dehydrogenase (ubiquinone) Fe-S protein 6; predicted  
gene 6415  
similar to Saccharopine dehydrogenase (putative); saccharopine dehydrogenase (putative)

similar to Solute carrier family 25 (mitochondrial carrier, phosphate carrier), member 3; solute carrier family 25  
(mitochondrial carrier, phosphate carrier), member 3  
similar to Unknown (protein for IMAGE:4910858); predicted gene 4076  
similar to Voltage-dependent anion-selective channel protein 2 (VDAC-2) (mVDAC2) (mVDAC6) (Outer mitochondrial  
membrane protein porin 2); predicted gene 7832; voltage-dependent anion channel 2  
similar to adenylate kinase 2; adenylate kinase 2  
similar to brain protein 44-like protein; brain protein 44-like; predicted gene 3452; predicted gene 8219  
similar to cytochrome b5 outer mitochondrial membrane precursor; cytochrome b5 type I  
similar to cytochrome c oxidase, subunit VIIc; predicted gene 3386; cytochrome c oxidase, subunit VIIc  
similar to cytochrome c oxidase, subunit Vb; predicted gene 11273; cytochrome c oxidase, subunit Vb  
similar to es1 protein; DNA segment, Chr 10, Johns Hopkins University 81 expressed  
similar to lactamase, beta; lactamase, beta  
similar to lysyl-tRNA synthetase; lysyl-tRNA synthetase  
similar to mitochondrial malonyltransferase isoform b precursor; malonyl CoA:ACP acyltransferase (mitochondrial)  
similar to mitofusin 2; mitofusin 2

similar to optic atrophy 1 (autosomal dominant); optic atrophy 1 homolog (human)

similar to polynucleotide phosphorylase-like protein; polyribonucleotide nucleotidyltransferase  
sirtuin 5 (silent mating type information regulation 2 homolog) 5 (S. cerevisiae)  
solute carrier family 16 (monocarboxylic acid transporters), member 1  
solute carrier family 25 (mitochondrial carnitine/acylcarnitine translocase), member 20  
solute carrier family 25 (mitochondrial carrier oxoglutarate carrier), member 11  
solute carrier family 25 (mitochondrial carrier, Aralar), member 12  
solute carrier family 25 (mitochondrial carrier, adenine nucleotide translocator), member 13  
solute carrier family 25 (mitochondrial carrier, adenine nucleotide translocator), member 4  
solute carrier family 25 (mitochondrial carrier, adenine nucleotide translocator), member 5; similar to ADP/ATP translocase  
2 (Adenine nucleotide translocator 2) (ANT 2) (ADP,ATP carrier protein 2) (Solute carrier family 25 member 5); predicted  
gene 5529; predicted gene 8429; predicted gene 5256  
solute carrier family 25 (mitochondrial carrier, citrate transporter), member 1  
solute carrier family 25 (mitochondrial carrier, dicarboxylate transporter), member 10  
solute carrier family 25 (mitochondrial carrier, glutamate), member 22

solute carrier family 25, member 40  
solute carrier family 25, member 42  
solute carrier family 25, member 46  
sorting and assembly machinery component 50 homolog (S. cerevisiae)  
spastic paraplegia 7 homolog (human)  
staphylococcal nuclease and tudor domain containing 1  
sterol carrier protein 2, liver  
succinate dehydrogenase complex, subunit A, flavoprotein (Fp)  
succinate dehydrogenase complex, subunit B, iron sulfur (Ip); similar to succinate dehydrogenase Ip subunit  
succinate dehydrogenase complex, subunit C, integral membrane protein  
succinate-CoA ligase, GDP-forming, alpha subunit  
succinate-Coenzyme A ligase, ADP-forming, beta subunit  
succinate-Coenzyme A ligase, GDP-forming, beta subunit  
sulfide quinone reductase-like (yeast)  
sulfite oxidase  
superoxide dismutase 2, mitochondrial  
suppressor of var1, 3-like 1 (S. cerevisiae)  
tRNA 5-methylaminomethyl-2-thiouridylyl methyltransferase  
tRNA nucleotidyl transferase, CCA-adding, 1  
thioredoxin 2  
thioredoxin reductase 2; similar to thioredoxin reductase 2  
thiosulfate sulfurtransferase, mitochondrial  
transcription factor A, mitochondrial

|                                                                                                                     |                                                                                                               |
|---------------------------------------------------------------------------------------------------------------------|---------------------------------------------------------------------------------------------------------------|
| IPI00649594, IPI00848390, IPI00453815, IPI00828226, IPI00881541, IPI00648278                                        | transforming growth factor beta regulated gene 4; similar to Transforming growth factor beta regulated gene 4 |
| IPI00126861                                                                                                         | transglutaminase 2, C polypeptide                                                                             |
| IPI00165902                                                                                                         | translocase of inner mitochondrial membrane 10 homolog (yeast)                                                |
| IPI00134484                                                                                                         | translocase of inner mitochondrial membrane 13 homolog (yeast)                                                |
| IPI00885780, IPI00315325, IPI00515156                                                                               | translocase of inner mitochondrial membrane 22 homolog (yeast)                                                |
| IPI00135068, IPI00889924                                                                                            | translocase of inner mitochondrial membrane 44                                                                |
| IPI00111045                                                                                                         | translocase of inner mitochondrial membrane 50 homolog (yeast)                                                |
| IPI00125513                                                                                                         | translocase of inner mitochondrial membrane 9 homolog (yeast)                                                 |
| IPI00474157, IPI00875326                                                                                            | translocase of outer mitochondrial membrane 40 homolog (yeast)                                                |
| IPI00751137, IPI00377728                                                                                            | translocase of outer mitochondrial membrane 70 homolog A (yeast)                                              |
| IPI00122499, IPI00885696, IPI00830213                                                                               | transmembrane protein 143                                                                                     |
| IPI00130661                                                                                                         | tripeptidyl peptidase I                                                                                       |
| IPI00460008, IPI00111613, IPI00307938                                                                               | tryptophanyl tRNA synthetase 2 (mitochondrial)                                                                |
| IPI00118384, IPI00828266, IPI00885651                                                                               | tyrosine 3-monooxygenase/tryptophan 5-monooxygenase activation protein, epsilon polypeptide                   |
| IPI00119138                                                                                                         | ubiquinol cytochrome c reductase core protein 2                                                               |
| IPI00857580, IPI00109603, IPI00857713, IPI00919103, IPI00858246, IPI00858043, IPI00857602, IPI00230305, IPI00749564 | ubiquinol-cytochrome c reductase complex chaperone, CBP3 homolog (yeast)                                      |
| IPI00653598, IPI00111885                                                                                            | ubiquinol-cytochrome c reductase core protein 1                                                               |
| IPI00133240                                                                                                         | ubiquinol-cytochrome c reductase, Rieske iron-sulfur polypeptide 1                                            |
| IPI00648640, IPI00224210                                                                                            | ubiquinol-cytochrome c reductase, complex III subunit VII                                                     |
| IPI00114153                                                                                                         | uncoupling protein 3 (mitochondrial, proton carrier)                                                          |
| IPI00624653                                                                                                         | upregulated during skeletal muscle growth 5                                                                   |
| IPI00222180                                                                                                         | valyl-tRNA synthetase 2, mitochondrial (putative); similar to valyl-tRNA synthetase 2-lik                     |
| IPI00230540, IPI00122549, IPI00857067                                                                               | voltage-dependent anion channel 1                                                                             |
| IPI00221569                                                                                                         | zinc binding alcohol dehydrogenase, domain containing 2                                                       |

Mitochondrial proteomic profiling in compensated hypertrophy (CH) and heart failure (HF). Quantitative proteomic analysis was done using the Stable Isotope Labeling by Amino ACids (SILAC) method in mitochondria isolated from the ventricles of sham-operated, CH, and HF animals. Mitochondrial proteins identified in all samples are listed. GOCC annotation in DAVID and the Mitocarta were used to define proteins as mitochondrial.

**Supplemental Table 2: Proteins regulated in compensated hypertrophy (CH) and heart failure (HF) samples.**

| Gene Symbol   | Protein Names                                                            | CH/CTRL | HF/CTRL |
|---------------|--------------------------------------------------------------------------|---------|---------|
| Abhd11        | Abhydrolase domain-containing protein 11                                 | 1.28    | 3.45    |
| Nfu1          | Putative uncharacterized protein                                         | 1.19    | 2.71    |
| Fahd2a        | Fumarylacetoacetate hydrolase domain-containing protein 2A               | -1.07   | 2.02    |
| Abat          | 4-aminobutyrate aminotransferase                                         | 1.84    | 1.95    |
| Bdh1          | 3-hydroxybutyrate dehydrogenase                                          | 2.74    | 1.89    |
| Hagh          | Hydroxyacylglutathione hydrolase                                         | 1.73    | 1.80    |
| Cltc          | Clathrin heavy chain                                                     | 1.38    | 1.78    |
| Nln           | Neurolysin                                                               | 1.63    | 1.65    |
| Slc25a10      | Mitochondrial dicarboxylate carrier                                      | 1.17    | 1.55    |
| Rars2         | Probable arginyl-tRNA synthetase                                         | 1.43    | 1.52    |
| Cbr2          | Carbonyl reductase [NADPH] 2                                             | 1.68    | 1.49    |
| Ccdc58        | Coiled-coil domain-containing protein 58                                 | 1.51    | 1.44    |
| Hk1           | Hexokinase 1                                                             | 1.65    | 1.44    |
| Ctsb          | Cathepsin B;Cathepsin B1;Cathepsin B light chain;Cathepsin B heavy chair | 1.53    | 1.43    |
| Slc25a1       | Solute carrier family 25                                                 | 1.75    | 1.43    |
| Cyb5r3        | Cytochrome b5 reductase 3                                                | 1.84    | 1.38    |
| Nudt13        | Nucleoside diphosphate-linked moiety X motif 13                          | 1.62    | 1.37    |
| Acot9         | Acyl-coenzyme A thioesterase 9                                           | 1.67    | 1.37    |
| Cyb5r1        | NADH-cytochrome b5 reductase 1                                           | 1.76    | 1.37    |
| Cpox          | Coproporphyrinogen-III oxidase                                           | 1.68    | 1.33    |
| Hk2           | Hexokinase-2                                                             | 1.69    | 1.32    |
| Ghitm         | Growth hormone-inducible transmembrane protein                           | 1.53    | 1.31    |
| Gyk           | Glycerol kinase                                                          | 1.54    | 1.31    |
| Tomm70a       | Translocase of outer membrane 70 kDa subunit                             | 1.65    | 1.28    |
| Gfer          | FAD-linked sulfhydryl oxidase ALR                                        | 1.69    | 1.20    |
| Acsf2         | Acyl-CoA synthetase family member 2                                      | 1.59    | 1.14    |
| Tmem126a      | Transmembrane protein 126A                                               | 3.00    | 1.13    |
| Mrps30        | 28S ribosomal protein S30                                                | 1.54    | 1.10    |
| Timm22        | Mitochondrial import inner membrane translocase subunit                  | -1.27   | 1.02    |
| Slc25a42      | Solute carrier family 25 member 42                                       | -1.44   | -1.18   |
| Acss1         | Acetyl-coenzyme A synthetase 2-like                                      | -1.27   | -1.19   |
| Agps          | Alkylglycerone phosphate synthase                                        | -1.73   | -1.19   |
| Cat           | Catalase                                                                 | -1.37   | -1.21   |
| Gstk1         | Glutathione S-transferase kappa 1                                        | -1.37   | -1.25   |
| Opa3          | Optic atrophy 3 protein homolog                                          | 1.13    | -1.26   |
| Tmem143       | Transmembrane protein 143                                                | 1.06    | -1.26   |
| Cisd1         | CDGSH iron sulfur domain-containing protein 1                            | 1.27    | -1.26   |
| Acaa2         | Acetyl-Coenzyme A acyltransferase 2                                      | -1.32   | -1.27   |
| 9030617O03Rik | Probable 10-formyltetrahydrofolate dehydrogenase                         | -1.55   | -1.29   |
| Slc25a22      | Mitochondrial glutamate carrier 1                                        | -1.39   | -1.32   |
| Cox6a2        | Cytochrome c oxidase subunit 6A2                                         | -1.38   | -1.35   |
| Scp2          | Non-specific lipid-transfer protein                                      | -1.33   | -1.37   |
| Ak1           | Adenylate kinase isoenzyme 1                                             | -1.29   | -1.38   |
| Hsd17b4       | 17-beta-hydroxysteroid dehydrogenase 4                                   | -1.46   | -1.38   |
| Ech1          | Delta(3,5)-Delta(2,4)-dienoyl-CoA isomerase                              | -1.47   | -1.39   |
| Gpd1          | Glycerol-3-phosphate dehydrogenase [NAD+]                                | -1.35   | -1.39   |
| Abcd3         | ATP-binding cassette, sub-family D (ALD), member 3                       | -1.64   | -1.41   |
| Acad11        | Acyl-CoA dehydrogenase family member 11                                  | -1.66   | -1.42   |
| Ppm1k         | Protein phosphatase 1K                                                   | -1.61   | -1.42   |
| Acox1         | Acyl-Coenzyme A oxidase 1                                                | -1.71   | -1.54   |
| Mdh1          | Malate dehydrogenase                                                     | -1.51   | -1.54   |
| Ehhadh        | Enoyl-CoA hydratase/3,2-trans-enoyl-CoA isomerase                        | -1.36   | -1.60   |
| Ldhb          | L-lactate dehydrogenase B chain                                          | -1.75   | -1.83   |
| Ucp3          | Mitochondrial uncoupling protein 3                                       | -1.56   | -1.84   |
| Pkm2          | Pyruvate kinase isozymes M1/M2;Pyruvate kinase muscle isozyme            | -1.10   | -1.91   |

Quantitative proteomic analysis was done using the St<sup>13</sup>able Isotope Labeling by Amino ACids (SILAC) method in mitochondria isolated from the ventricles of sham-operated, CH, and HF animals. Proteins that exhibited a significant difference in the CH and/or HF models vs. corresponding sham-operated controls as determined using mass spectrometry-based quantitative proteomic analysis (MS/MS processing; Thermo Scientific LTQ Orbitrap Velos) are listed. A cut-off of < -1.25 or > 1.5 FC was used to identify regulated proteins.

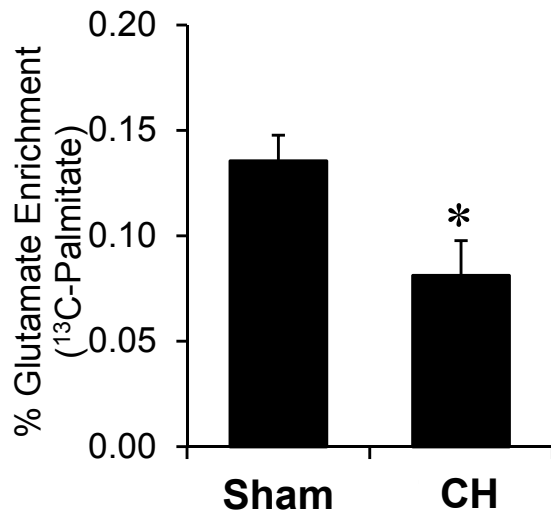

**Supplemental Figure 1. Reduced palmitate oxidation in the hypertrophied heart.** The relative contribution of palmitate to TCA carbon cycle flux is shown for CH and sham-operated controls. Data are shown as mean  $\pm$ SEM (n=6, Sham and 7, CH).

## Plasma Ketones

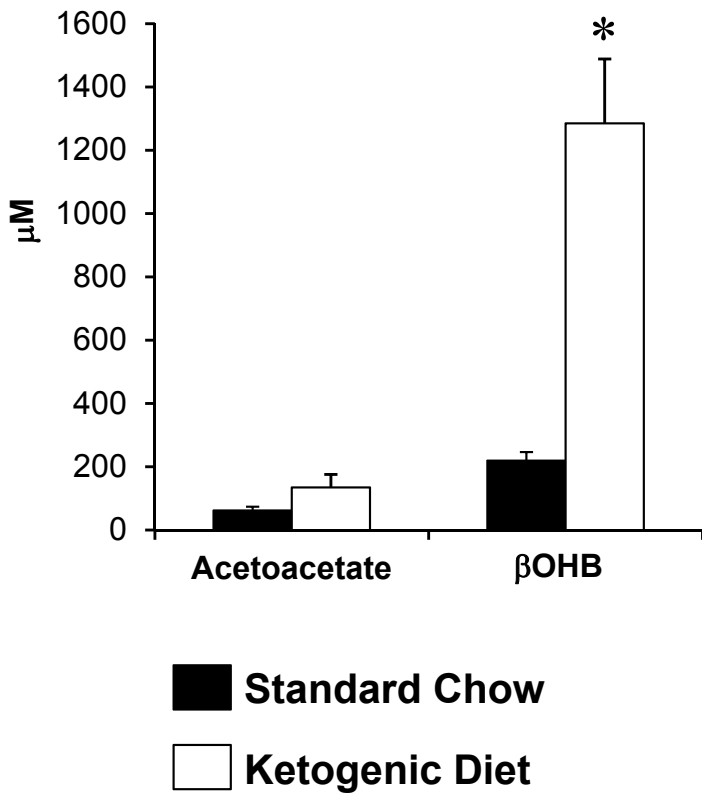

**Supplemental Figure 2. Ketogenic diet results in an increase in circulating ketone bodies.** Plasma ketone levels measured in wild-type C57BL/6J mice fed a ketogenic diet for 4 weeks compared to control diet fed mice. Bars represent mean  $\pm$ SEM values (n=6-7 per group) \* $p < 0.05$ .

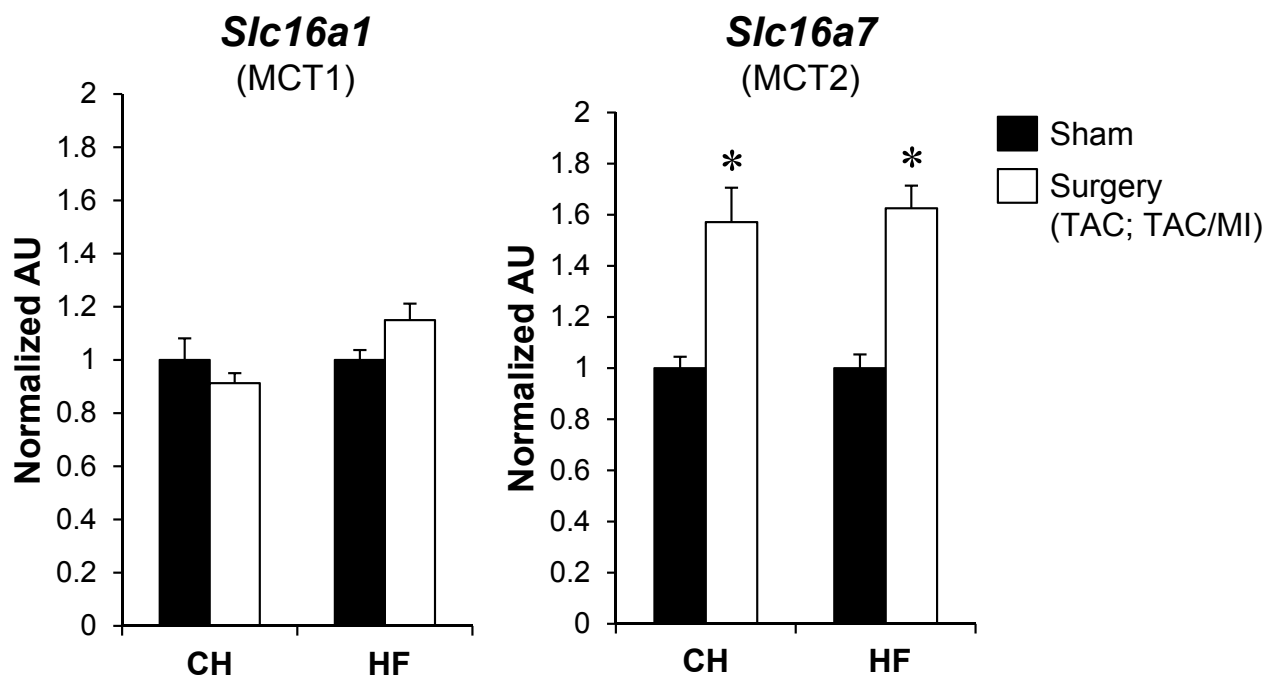

**Supplemental Figure 3. *Slc16a1* expression is induced in the hypertrophied and failing mouse heart.** *Slc16a1* (MCT1) and *Slc16a7* (MCT2) mRNA levels in cardiac ventricular tissue from mice 4 weeks after sham, TAC (CH), or TAC/MI (HF) surgeries. Samples were taken 24 h (Fasted) after feeding. Expression is normalized to *Rplp0* (36B4). Bars represent mean  $\pm$ SEM values (n=6-21 per group) \*p<0.05.



## SUPPLEMENTAL REFERENCES

1. Pagliarini DJ, Calvo SE, Chang B, et al. A mitochondrial protein compendium elucidates complex I disease biology. *Cell*. 2008;134:112-123.
2. Shevchenko A, Tomas H, Havlis J, Olsen JV, Mann M. In-gel digestion for mass spectrometric characterization of proteins and proteomes. *Nat Protoc*. 2006;1:2856-2860.
3. Rappsilber J, Ishihama Y, Mann M. Stop and go extraction tips for matrix-assisted laser desorption/ionization, nanoelectrospray, and LC/MS sample pretreatment in proteomics. *Anal Chem*. 2003;75:663-670.
4. Cox J, Mann M. MaxQuant enables high peptide identification rates, individualized p.p.b.-range mass accuracies and proteome-wide protein quantification. *Nat Biotechnol*. 2008;26:1367-1372.
5. Millington DS, Kodo N, Norwood DL, Roe CR. Tandem mass spectrometry: a new method for acylcarnitine profiling with potential for neonatal screening for inborn errors of metabolism. *J Inherit Metab Dis*. 1990;13:321-324.
6. Jensen MV, Joseph JW, Ilkayeva O, Burgess S, Lu D, Ronnebaum SM, Odegaard M, Becker TC, Sherry AD, Newgard CB. Compensatory responses to pyruvate carboxylase suppression in islet beta-cells. Preservation of glucose-stimulated insulin secretion. *J Biol Chem*. 2006;281:22342-22351.
